# Supplementary material
Source: PubMed Central journal article supplement (PMC4637696)
Supplement: ijcep0008-11485-f2.pdf [file ijcep0008-11485-f2.pdf]

## TERTp and IDH in grade II and III gliomas

**Table S1.** Details about clinical and molecular data of 225 WHO grade II and III gliomas

| Serial number | Gender | Gender code | Age | Age code | Pathology | Pathology code | Location                     | Location code | Location code 2 | TERTp     | TERTp code | IDH1/2 | IDH1/2 code | IDH-TERTp code |
|---------------|--------|-------------|-----|----------|-----------|----------------|------------------------------|---------------|-----------------|-----------|------------|--------|-------------|----------------|
| 1             | F      | 1           | 28  | 1        | OII       | 1              | Right Frontal                | 1             | R               | mutation  | 1          | R132H  | 1           | 1              |
| 2             | M      | 0           | 34  | 1        | OAI       | 1              | Left Parietal-occipital      | 2             | L               | mutation  | 1          | R132H  | 1           | 1              |
| 3             | F      | 1           | 40  | 1        | OAI       | 1              | Right Temporal               | 2             | R               | mutation  | 1          | R132H  | 1           | 1              |
| 4             | F      | 1           | 40  | 1        | OAI       | 1              | Left Frontal                 | 1             | L               | mutation  | 1          | R132H  | 1           | 1              |
| 5             | M      | 0           | 47  | 2        | OII       | 1              | Left Frontal                 | 1             | L               | mutation  | 1          | R132H  | 1           | 1              |
| 6             | M      | 0           | 41  | 2        | OAI       | 1              | Right Frontotemporal-insular | 2             | R               | mutation  | 1          | R132H  | 1           | 1              |
| 7             | M      | 0           | 27  | 1        | OAI       | 1              | Left Frontal                 | 1             | L               | mutation  | 1          | R132H  | 1           | 1              |
| 8             | F      | 1           | 44  | 2        | OAI       | 1              | Right Temporal               | 2             | R               | mutation  | 1          | R132H  | 1           | 1              |
| 9             | M      | 0           | 35  | 1        | OAI       | 1              | Left Frontal                 | 1             | L               | mutation  | 1          | R132H  | 1           | 1              |
| 10            | M      | 0           | 23  | 1        | AI        | 1              | Right Frontal                | 1             | R               | mutation  | 1          | R172K  | 1           | 1              |
| 11            | F      | 1           | 30  | 1        | OAI       | 1              | Left Frontotemporal          | 2             | L               | mutation  | 1          | R172K  | 1           | 1              |
| 12            | M      | 0           | 38  | 1        | OII       | 1              | Right Temporal               | 2             | R               | mutation  | 1          | R132H  | 1           | 1              |
| 13            | M      | 0           | 66  | 2        | AI        | 1              | Right Frontal                | 1             | R               | mutation  | 1          | R132H  | 1           | 1              |
| 14            | M      | 0           | 37  | 1        | OAI       | 1              | Left Parietal                | 2             | L               | mutation  | 1          | R132H  | 1           | 1              |
| 15            | M      | 0           | 32  | 1        | AI        | 1              | Left Insula                  | 2             | L               | mutation  | 1          | R132H  | 1           | 1              |
| 16            | M      | 0           | 55  | 2        | AIII      | 2              | Left Temporal                | 2             | L               | mutation  | 1          | R132H  | 1           | 1              |
| 17            | M      | 0           | 48  | 2        | OII       | 1              | Right Frontal                | 1             | R               | mutation  | 1          | R132H  | 1           | 1              |
| 18            | M      | 0           | 45  | 2        | OAI       | 1              | Right Frontal                | 1             | R               | mutation  | 1          | R132H  | 1           | 1              |
| 19            | F      | 1           | 54  | 2        | AI        | 1              | Left Frontal                 | 1             | L               | mutation  | 1          | R132H  | 1           | 1              |
| 20            | F      | 1           | 40  | 1        | AI        | 1              | Left Temporal                | 2             | L               | mutation  | 1          | R132H  | 1           | 1              |
| 21            | F      | 1           | 35  | 1        | OAI       | 1              | Left Parietal                | 2             | L               | mutation  | 1          | R132H  | 1           | 1              |
| 22            | M      | 0           | 50  | 2        | OII       | 1              | Bilateral Frontal            | 1             | B               | mutation  | 1          | R132H  | 1           | 1              |
| 23            | F      | 1           | 43  | 2        | OII       | 1              | Right Frontal                | 1             | R               | mutation  | 1          | R132H  | 1           | 1              |
| 24            | M      | 0           | 65  | 2        | OII       | 1              | Bilateral Frontal            | 1             | B               | mutation  | 1          | R132H  | 1           | 1              |
| 25            | F      | 1           | 58  | 2        | AOIII     | 2              | Bilateral Frontal            | 1             | B               | mutation  | 1          | R132H  | 1           | 1              |
| 26            | M      | 0           | 60  | 2        | AOIII     | 2              | Left Frontal                 | 1             | L               | mutation  | 1          | R132H  | 1           | 1              |
| 27            | F      | 1           | 43  | 2        | OII       | 1              | Right Frontal                | 1             | R               | mutation  | 1          | R132H  | 1           | 1              |
| 28            | M      | 0           | 45  | 2        | OAI       | 1              | Left temporal-insular        | 2             | L               | mutation  | 1          | R132H  | 1           | 1              |
| 29            | F      | 1           | 51  | 2        | OAI       | 1              | Left Frontal                 | 1             | L               | mutation  | 1          | R132H  | 1           | 1              |
| 30            | M      | 0           | 37  | 1        | AI        | 1              | Left Temporal                | 2             | L               | wild type | 0          | R132H  | 1           | 2              |

## TERTp and IDH in grade II and III gliomas

|    |   |   |    |   |        |   |                                                |   |   |           |    |           |   |    |
|----|---|---|----|---|--------|---|------------------------------------------------|---|---|-----------|----|-----------|---|----|
| 31 | F | 1 | 42 | 2 | OAI    | 1 | Left Parietal                                  | 2 | L | wild type | 0  | R132H     | 1 | 2  |
| 32 | F | 1 | 42 | 2 | OII    | 1 | Right Frontal                                  | 1 | R | wild type | 0  | R132H     | 1 | 2  |
| 33 | M | 0 | 26 | 1 | OAI    | 1 | Right Frontal                                  | 1 | R | wild type | 0  | R132H     | 1 | 2  |
| 34 | M | 0 | 57 | 2 | OAI    | 1 | Left Frontal                                   | 1 | L | wild type | 0  | R132H     | 1 | 2  |
| 35 | F | 1 | 37 | 1 | AII    | 1 | Left Frontal                                   | 1 | L | wild type | 0  | R132H     | 1 | 2  |
| 36 | M | 0 | 37 | 1 | OAI    | 1 | Right Temporal-occipital and Lateral ventricle | 2 | R | wild type | 0  | R132H     | 1 | 2  |
| 37 | M | 0 | 49 | 2 | OII    | 1 | Left Frontal                                   | 1 | L | wild type | 0  | R132H     | 1 | 2  |
| 38 | F | 1 | 41 | 2 | OAI    | 1 | Bilateral Frontal                              | 1 | B | wild type | 0  | R132H     | 1 | 2  |
| 39 | M | 0 | 50 | 2 | OAI    | 1 | Right Frontal                                  | 1 | R | ND        | ND | R132H     | 1 | ND |
| 40 | F | 1 | 40 | 1 | AII    | 1 | Left Frontal                                   | 1 | L | mutation  | 1  | R132H     | 1 | 1  |
| 41 | F | 1 | 36 | 1 | OII    | 1 | Left Frontal                                   | 1 | L | mutation  | 1  | R132H     | 1 | 1  |
| 42 | F | 1 | 32 | 1 | AII    | 1 | Left Temporal                                  | 2 | L | mutation  | 1  | R132H     | 1 | 1  |
| 43 | M | 0 | 47 | 2 | AII    | 1 | Right Frontal                                  | 1 | R | mutation  | 1  | R132H     | 1 | 1  |
| 44 | M | 0 | 41 | 2 | AAIII  | 2 | Left Frontal                                   | 1 | L | mutation  | 1  | R132H     | 1 | 1  |
| 45 | M | 0 | 53 | 2 | OII    | 1 | Right Parietal                                 | 2 | R | mutation  | 1  | R132H     | 1 | 1  |
| 46 | M | 0 | 48 | 2 | AII    | 1 | Right Temporal                                 | 2 | R | mutation  | 1  | R132H     | 1 | 1  |
| 47 | F | 1 | 31 | 1 | AII    | 1 | Left Temporal                                  | 2 | L | mutation  | 1  | R132H     | 1 | 1  |
| 48 | F | 1 | 32 | 1 | OII    | 1 | Right Frontal                                  | 1 | R | mutation  | 1  | R132H     | 1 | 1  |
| 49 | M | 0 | 32 | 1 | AOAIII | 2 | Right Frontal                                  | 1 | R | mutation  | 1  | R132H     | 1 | 1  |
| 50 | F | 1 | 34 | 1 | AOIII  | 2 | Left Frontoparietal                            | 2 | L | mutation  | 1  | R132H     | 1 | 1  |
| 51 | M | 0 | 45 | 2 | OAI    | 1 | Right Frontal                                  | 1 | R | mutation  | 1  | R132H     | 1 | 1  |
| 52 | F | 1 | 49 | 2 | OII    | 1 | Bilateral Frontoparietal                       | 2 | B | mutation  | 1  | R132H     | 1 | 1  |
| 53 | F | 1 | 42 | 2 | OII    | 1 | Left Temporal                                  | 2 | L | mutation  | 1  | R132H     | 1 | 1  |
| 54 | M | 0 | 36 | 1 | AOAIII | 2 | Bilateral Frontoparietal                       | 2 | B | mutation  | 1  | R132H     | 1 | 1  |
| 55 | F | 1 | 33 | 1 | OAI    | 1 | Left Frontal                                   | 1 | L | mutation  | 1  | R132H     | 1 | 1  |
| 56 | M | 0 | 49 | 2 | OAI    | 1 | Right Frontotemporal-insular                   | 2 | R | mutation  | 1  | R132H     | 1 | 1  |
| 57 | F | 1 | 58 | 2 | AII    | 1 | Right Frontal                                  | 1 | R | mutation  | 1  | wild type | 0 | 2  |
| 58 | F | 1 | 36 | 1 | AAIII  | 2 | Right Frontal                                  | 1 | R | mutation  | 1  | wild type | 0 | 2  |
| 59 | M | 0 | 50 | 2 | AAIII  | 2 | Left Temporal                                  | 2 | L | mutation  | 1  | wild type | 0 | 2  |
| 60 | F | 1 | 46 | 2 | AII    | 1 | Cingulum                                       | 2 | X | mutation  | 1  | wild type | 0 | 2  |
| 61 | M | 0 | 48 | 2 | AAIII  | 2 | Intraventricular                               | 3 | X | mutation  | 1  | wild type | 0 | 2  |
| 62 | M | 0 | 65 | 2 | AAIII  | 2 | Intraventricular                               | 3 | X | mutation  | 1  | wild type | 0 | 2  |

## TERTp and IDH in grade II and III gliomas

|    |   |   |    |   |       |   |                             |   |   |           |   |           |   |   |
|----|---|---|----|---|-------|---|-----------------------------|---|---|-----------|---|-----------|---|---|
| 63 | F | 1 | 57 | 2 | All   | 1 | Right Frontal               | 1 | R | mutation  | 1 | wild type | 0 | 2 |
| 64 | M | 0 | 60 | 2 | AAIII | 2 | Right Temporal              | 2 | R | mutation  | 1 | wild type | 0 | 2 |
| 65 | M | 0 | 70 | 2 | AAIII | 2 | Right Parietal              | 2 | R | mutation  | 1 | wild type | 0 | 2 |
| 66 | M | 0 | 13 | 1 | AAIII | 2 | Bilateral Parietal          | 2 | B | mutation  | 1 | wild type | 0 | 2 |
| 67 | F | 1 | 54 | 2 | AAIII | 2 | Right Frontal               | 1 | R | mutation  | 1 | wild type | 0 | 2 |
| 68 | M | 0 | 48 | 2 | AAIII | 2 | Right Frontal               | 1 | R | mutation  | 1 | wild type | 0 | 2 |
| 69 | M | 0 | 46 | 2 | All   | 1 | Right Temporal              | 2 | R | mutation  | 1 | wild type | 0 | 2 |
| 70 | F | 1 | 45 | 2 | All   | 1 | Left Parietal               | 2 | L | wild type | 0 | R132H     | 1 | 2 |
| 71 | M | 0 | 38 | 1 | All   | 1 | Right Frontal               | 1 | R | wild type | 0 | R132H     | 1 | 2 |
| 72 | F | 1 | 46 | 2 | All   | 1 | Left Temporal               | 2 | L | wild type | 0 | R132H     | 1 | 2 |
| 73 | M | 0 | 39 | 1 | All   | 1 | Right Frontal               | 1 | R | wild type | 0 | R132H     | 1 | 2 |
| 74 | M | 0 | 58 | 2 | All   | 1 | Right Temporal              | 2 | R | wild type | 0 | R132H     | 1 | 2 |
| 75 | M | 0 | 32 | 1 | All   | 1 | Left Parietal               | 2 | L | wild type | 0 | R132H     | 1 | 2 |
| 76 | M | 0 | 34 | 1 | All   | 1 | Left Frontotemporal-insular | 2 | L | wild type | 0 | R132H     | 1 | 2 |
| 77 | F | 1 | 52 | 2 | OAll  | 1 | Left Frontoparietal         | 2 | L | wild type | 0 | R172K     | 1 | 2 |
| 78 | F | 1 | 42 | 2 | OAll  | 1 | Right Frontal               | 1 | R | wild type | 0 | R132H     | 1 | 2 |
| 79 | F | 1 | 35 | 1 | OAll  | 1 | Bilateral Cerebellum        | 2 | B | wild type | 0 | R132S     | 1 | 2 |
| 80 | F | 1 | 47 | 2 | All   | 1 | Right Frontotemporal        | 2 | R | wild type | 0 | R132H     | 1 | 2 |
| 81 | M | 0 | 26 | 1 | All   | 1 | Right Frontal               | 1 | R | wild type | 0 | R132H     | 1 | 2 |
| 82 | M | 0 | 41 | 2 | All   | 1 | Left Temporal               | 2 | L | wild type | 0 | R132H     | 1 | 2 |
| 83 | M | 0 | 49 | 2 | All   | 1 | Right Frontal               | 1 | R | wild type | 0 | R132H     | 1 | 2 |
| 84 | M | 0 | 38 | 1 | OAll  | 1 | Right Frontal               | 1 | R | wild type | 0 | R132H     | 1 | 2 |
| 85 | F | 1 | 55 | 2 | OII   | 1 | Right Frontotemporal        | 2 | R | wild type | 0 | R132H     | 1 | 2 |
| 86 | M | 0 | 79 | 2 | All   | 1 | Left Frontal                | 1 | L | wild type | 0 | R132H     | 1 | 2 |
| 87 | M | 0 | 28 | 1 | All   | 1 | Left Temporal               | 2 | L | wild type | 0 | R132H     | 1 | 2 |
| 88 | F | 1 | 46 | 2 | OAll  | 1 | Left Frontotemporal         | 2 | L | wild type | 0 | R132H     | 1 | 2 |
| 89 | M | 0 | 54 | 2 | All   | 1 | Right Frontotemporal        | 2 | R | wild type | 0 | R132H     | 1 | 2 |
| 90 | M | 0 | 32 | 1 | All   | 1 | Left Frontal                | 1 | L | wild type | 0 | R132H     | 1 | 2 |
| 91 | M | 0 | 36 | 1 | All   | 1 | Left Temporal               | 2 | L | wild type | 0 | R132H     | 1 | 2 |
| 92 | M | 0 | 36 | 1 | All   | 1 | Left Frontal                | 1 | L | wild type | 0 | R132H     | 1 | 2 |
| 93 | M | 0 | 32 | 1 | All   | 1 | Right Temporal              | 2 | R | wild type | 0 | R132H     | 1 | 2 |
| 94 | F | 1 | 43 | 2 | All   | 1 | Corpus callosum             | 2 | X | wild type | 0 | R172M     | 1 | 2 |

## TERTp and IDH in grade II and III gliomas

|     |   |   |    |   |       |   |                                  |   |   |           |   |       |   |   |
|-----|---|---|----|---|-------|---|----------------------------------|---|---|-----------|---|-------|---|---|
| 95  | M | 0 | 31 | 1 | All   | 1 | Left Temporal                    | 2 | L | wild type | 0 | R132H | 1 | 2 |
| 96  | M | 0 | 29 | 1 | All   | 1 | Left Insula                      | 2 | L | wild type | 0 | R132H | 1 | 2 |
| 97  | F | 1 | 60 | 2 | All   | 1 | Left Frontal                     | 1 | L | wild type | 0 | R132H | 1 | 2 |
| 98  | M | 0 | 42 | 2 | All   | 1 | Right Parietal                   | 2 | R | wild type | 0 | R132H | 1 | 2 |
| 99  | M | 0 | 46 | 2 | All   | 1 | Left Frontotemporal              | 2 | L | wild type | 0 | R132H | 1 | 2 |
| 100 | M | 0 | 31 | 1 | All   | 1 | Right Temporal                   | 2 | R | wild type | 0 | R132H | 1 | 2 |
| 101 | M | 0 | 46 | 2 | All   | 1 | Left Frontal                     | 1 | L | wild type | 0 | R132H | 1 | 2 |
| 102 | F | 1 | 34 | 1 | OAll  | 1 | Left Frontal                     | 1 | L | wild type | 0 | R132H | 1 | 2 |
| 103 | M | 0 | 68 | 2 | All   | 1 | Left Frontal                     | 1 | L | wild type | 0 | R132H | 1 | 2 |
| 104 | F | 1 | 45 | 2 | AAIII | 2 | Left Temporal                    | 2 | L | wild type | 0 | R132H | 1 | 2 |
| 105 | M | 0 | 49 | 2 | AAIII | 2 | Right lateral ventricle trigonal | 3 | X | wild type | 0 | R132H | 1 | 2 |
| 106 | F | 1 | 48 | 2 | AAIII | 2 | Right Frontoparietal             | 2 | R | wild type | 0 | R132H | 1 | 2 |
| 107 | M | 0 | 51 | 2 | AAIII | 2 | Left Frontal                     | 1 | L | wild type | 0 | R132H | 1 | 2 |
| 108 | M | 0 | 41 | 2 | AAIII | 2 | Left Frontal                     | 1 | L | wild type | 0 | R132H | 1 | 2 |
| 109 | M | 0 | 39 | 1 | AAIII | 2 | Right Frontal                    | 1 | R | wild type | 0 | R132H | 1 | 2 |
| 110 | M | 0 | 31 | 1 | AAIII | 2 | Left Frontotemporal-insular      | 2 | L | wild type | 0 | R132H | 1 | 2 |
| 111 | F | 1 | 42 | 2 | OAll  | 1 | Left Frontal                     | 1 | L | wild type | 0 | R132H | 1 | 2 |
| 112 | F | 1 | 31 | 1 | All   | 1 | Left Frontal                     | 1 | L | wild type | 0 | R132H | 1 | 2 |
| 113 | M | 0 | 40 | 1 | AAIII | 2 | Bilateral Frontal                | 1 | B | wild type | 0 | R132H | 1 | 2 |
| 114 | M | 0 | 43 | 2 | OAll  | 1 | Right Frontal                    | 1 | R | wild type | 0 | R132H | 1 | 2 |
| 115 | M | 0 | 39 | 1 | OAll  | 1 | Left Temporal                    | 2 | L | wild type | 0 | R132H | 1 | 2 |
| 116 | M | 0 | 38 | 1 | All   | 1 | Left Parietal                    | 2 | L | wild type | 0 | R132H | 1 | 2 |
| 117 | M | 0 | 28 | 1 | All   | 1 | Left Frontal                     | 1 | L | wild type | 0 | R132H | 1 | 2 |
| 118 | F | 1 | 50 | 2 | All   | 1 | Right Parietal                   | 2 | R | wild type | 0 | R132H | 1 | 2 |
| 119 | F | 1 | 49 | 2 | All   | 1 | Left Temporal                    | 2 | L | wild type | 0 | R132H | 1 | 2 |
| 120 | F | 1 | 33 | 1 | All   | 1 | Right Insular                    | 2 | R | wild type | 0 | R132H | 1 | 2 |
| 121 | M | 0 | 38 | 1 | All   | 1 | Left Temporal                    | 2 | L | wild type | 0 | R132H | 1 | 2 |
| 122 | F | 1 | 31 | 1 | All   | 1 | Left Frontal                     | 1 | L | wild type | 0 | R132H | 1 | 2 |
| 123 | M | 0 | 36 | 1 | All   | 1 | Right Frontal                    | 1 | R | wild type | 0 | R132H | 1 | 2 |
| 124 | F | 1 | 34 | 1 | AAIII | 2 | Frontal and Corpus collosum      | 2 | X | wild type | 0 | R132H | 1 | 2 |
| 125 | M | 0 | 31 | 1 | AAIII | 2 | Brainstem                        | 3 | X | wild type | 0 | R132H | 1 | 2 |
| 126 | F | 1 | 46 | 2 | AAIII | 2 | Left Frontal                     | 1 | L | wild type | 0 | R132H | 1 | 2 |

## TERTp and IDH in grade II and III gliomas

|     |   |   |    |   |        |   |                                  |   |   |           |   |           |   |   |
|-----|---|---|----|---|--------|---|----------------------------------|---|---|-----------|---|-----------|---|---|
| 127 | F | 1 | 46 | 2 | All    | 1 | Left Parietal                    | 2 | L | wild type | 0 | R132H     | 1 | 2 |
| 128 | F | 1 | 35 | 1 | AAIII  | 2 | Left Frontotemporal              | 2 | L | wild type | 0 | R132H     | 1 | 2 |
| 129 | M | 0 | 37 | 1 | AAIII  | 2 | Left Parietal                    | 2 | L | wild type | 0 | R132H     | 1 | 2 |
| 130 | M | 0 | 38 | 1 | All    | 1 | Right Temporal                   | 2 | R | wild type | 0 | R132H     | 1 | 2 |
| 131 | M | 0 | 60 | 2 | AAIII  | 2 | Corpus callosum                  | 2 | X | wild type | 0 | R132H     | 1 | 2 |
| 132 | M | 0 | 38 | 1 | All    | 1 | Right Frontal                    | 1 | R | wild type | 0 | R132H     | 1 | 2 |
| 133 | M | 0 | 35 | 1 | All    | 1 | Left Temporal                    | 2 | L | wild type | 0 | R132H     | 1 | 2 |
| 134 | M | 0 | 32 | 1 | All    | 1 | Left Frontotemporal-insular      | 2 | L | wild type | 0 | R132H     | 1 | 2 |
| 135 | M | 0 | 39 | 1 | All    | 1 | Right Frontal                    | 1 | R | wild type | 0 | R132H     | 1 | 2 |
| 136 | M | 0 | 42 | 2 | OAll   | 1 | Left Parietal and Central sulcus | 2 | L | wild type | 0 | R132H     | 1 | 2 |
| 137 | M | 0 | 29 | 1 | All    | 1 | Left Temporal                    | 2 | L | wild type | 0 | R132H     | 1 | 2 |
| 138 | F | 1 | 24 | 1 | All    | 1 | Bilateral Frontal                | 1 | B | wild type | 0 | R132H     | 1 | 2 |
| 139 | M | 0 | 46 | 2 | All    | 1 | Bilateral Frontal                | 1 | B | wild type | 0 | R132H     | 1 | 2 |
| 140 | F | 1 | 39 | 1 | All    | 1 | Left Temporal                    | 2 | L | wild type | 0 | R132H     | 1 | 2 |
| 141 | M | 0 | 27 | 1 | AAIII  | 2 | Right Frontal                    | 1 | R | wild type | 0 | R132H     | 1 | 2 |
| 142 | F | 1 | 36 | 1 | All    | 1 | Right Parietal                   | 2 | R | wild type | 0 | R132H     | 1 | 2 |
| 143 | M | 0 | 39 | 1 | All    | 1 | Right Temporal                   | 2 | R | wild type | 0 | R132H     | 1 | 2 |
| 144 | F | 1 | 34 | 1 | All    | 1 | Left Frontal                     | 1 | L | wild type | 0 | R132H     | 1 | 2 |
| 145 | F | 1 | 33 | 1 | OAll   | 1 | Right Parietal-occipital         | 2 | R | wild type | 0 | R132H     | 1 | 2 |
| 146 | F | 1 | 30 | 1 | OAll   | 1 | Left Frontoparietal              | 2 | L | wild type | 0 | R132H     | 1 | 2 |
| 147 | M | 0 | 35 | 1 | All    | 1 | Left Temporal                    | 2 | L | wild type | 0 | R132H     | 1 | 2 |
| 148 | M | 0 | 33 | 1 | OII    | 1 | Left Parietal                    | 2 | L | wild type | 0 | R132H     | 1 | 2 |
| 149 | F | 1 | 46 | 2 | AOAIII | 2 | Right Frontal                    | 1 | R | wild type | 0 | R132H     | 1 | 2 |
| 150 | M | 0 | 36 | 1 | OAll   | 1 | Left Frontal-insular             | 2 | L | wild type | 0 | R132H     | 1 | 2 |
| 151 | M | 0 | 32 | 1 | OAll   | 1 | Left Temporal                    | 2 | L | wild type | 0 | R132H     | 1 | 2 |
| 152 | F | 1 | 61 | 2 | OAll   | 1 | Right Frontal                    | 1 | R | wild type | 0 | R132H     | 1 | 2 |
| 153 | F | 1 | 47 | 2 | All    | 1 | Left Frontal                     | 1 | L | wild type | 0 | R132H     | 1 | 2 |
| 154 | F | 1 | 25 | 1 | OAll   | 1 | Left Frontal                     | 1 | L | wild type | 0 | wild type | 0 | 3 |
| 155 | M | 0 | 24 | 1 | All    | 1 | Left Parietal                    | 2 | L | wild type | 0 | wild type | 0 | 3 |
| 156 | F | 1 | 40 | 1 | OAll   | 1 | Right Occipital                  | 2 | R | wild type | 0 | wild type | 0 | 3 |
| 157 | F | 1 | 28 | 1 | All    | 1 | Left Cerebellum                  | 2 | L | wild type | 0 | wild type | 0 | 3 |
| 158 | F | 1 | 21 | 1 | All    | 1 | Right Thalamus                   | 3 | X | wild type | 0 | wild type | 0 | 3 |

## TERTp and IDH in grade II and III gliomas

|     |   |   |    |   |       |   |                                            |   |   |           |   |           |   |   |
|-----|---|---|----|---|-------|---|--------------------------------------------|---|---|-----------|---|-----------|---|---|
| 159 | F | 1 | 25 | 1 | OAI   | 1 | Right lateral ventricle trigonal           | 3 | X | wild type | 0 | wild type | 0 | 3 |
| 160 | M | 0 | 22 | 1 | AI    | 1 | Right Temporal                             | 2 | R | wild type | 0 | wild type | 0 | 3 |
| 161 | M | 0 | 23 | 1 | AI    | 1 | Right Temporal                             | 2 | R | wild type | 0 | wild type | 0 | 3 |
| 162 | M | 0 | 35 | 1 | AI    | 1 | Left Parietal                              | 2 | L | wild type | 0 | wild type | 0 | 3 |
| 163 | F | 1 | 41 | 2 | AI    | 1 | Left Parietal                              | 2 | L | wild type | 0 | wild type | 0 | 3 |
| 164 | F | 1 | 29 | 1 | AI    | 1 | Left Parietal                              | 2 | L | wild type | 0 | wild type | 0 | 3 |
| 165 | M | 0 | 52 | 2 | AAIII | 2 | Right Temporal                             | 2 | R | wild type | 0 | wild type | 0 | 3 |
| 166 | M | 0 | 26 | 1 | AAIII | 2 | Bilateral Frontal and Corpus Callosum      | 2 | B | wild type | 0 | wild type | 0 | 3 |
| 167 | M | 0 | 38 | 1 | AAIII | 2 | Right lateral ventricle trigonal           | 3 | X | wild type | 0 | wild type | 0 | 3 |
| 168 | M | 0 | 53 | 2 | AI    | 1 | Left Frontotemporal                        | 2 | L | wild type | 0 | wild type | 0 | 3 |
| 169 | F | 1 | 63 | 2 | AAIII | 2 | Right Tempoparietal                        | 2 | R | wild type | 0 | wild type | 0 | 3 |
| 170 | M | 0 | 65 | 2 | AAIII | 2 | Left Parietal                              | 2 | L | wild type | 0 | wild type | 0 | 3 |
| 171 | M | 0 | 45 | 2 | AAIII | 2 | Left Frontal                               | 1 | L | wild type | 0 | wild type | 0 | 3 |
| 172 | M | 0 | 34 | 1 | AAIII | 2 | Left Frontal                               | 1 | L | wild type | 0 | wild type | 0 | 3 |
| 173 | F | 1 | 44 | 2 | AAIII | 2 | Left Frontal                               | 1 | L | wild type | 0 | wild type | 0 | 3 |
| 174 | M | 0 | 50 | 2 | AAIII | 2 | Left Frontotemporal                        | 2 | L | wild type | 0 | wild type | 0 | 3 |
| 175 | M | 0 | 58 | 2 | AAIII | 2 | Right Frontotemporal-insular               | 2 | R | wild type | 0 | wild type | 0 | 3 |
| 176 | M | 0 | 38 | 1 | AAIII | 2 | Thoracic code T6-8                         | 3 | X | wild type | 0 | wild type | 0 | 3 |
| 177 | F | 1 | 43 | 2 | AAIII | 2 | Right Occipital                            | 2 | R | wild type | 0 | wild type | 0 | 3 |
| 178 | M | 0 | 34 | 1 | AI    | 1 | Right Occipital                            | 2 | R | wild type | 0 | wild type | 0 | 3 |
| 179 | F | 1 | 51 | 2 | AI    | 1 | Corpus callosum                            | 2 | X | wild type | 0 | wild type | 0 | 3 |
| 180 | M | 0 | 48 | 2 | AAIII | 2 | Right Cerebellum                           | 2 | R | wild type | 0 | wild type | 0 | 3 |
| 181 | M | 0 | 51 | 2 | AAIII | 2 | Right Basal ganglion                       | 3 | X | wild type | 0 | wild type | 0 | 3 |
| 182 | F | 1 | 34 | 1 | AAIII | 2 | Left Frontal                               | 1 | L | wild type | 0 | wild type | 0 | 3 |
| 183 | M | 0 | 27 | 1 | AAIII | 2 | Brainstem                                  | 3 | X | wild type | 0 | wild type | 0 | 3 |
| 184 | M | 0 | 33 | 1 | AI    | 1 | Intraventricular                           | 3 | X | wild type | 0 | wild type | 0 | 3 |
| 185 | M | 0 | 40 | 1 | AI    | 1 | Right Temporal                             | 2 | R | wild type | 0 | wild type | 0 | 3 |
| 186 | M | 0 | 14 | 1 | AI    | 1 | Right Temporal                             | 2 | R | wild type | 0 | wild type | 0 | 3 |
| 187 | M | 0 | 45 | 2 | AI    | 1 | Right Temporal                             | 2 | R | wild type | 0 | wild type | 0 | 3 |
| 188 | M | 0 | 48 | 2 | AI    | 1 | Left Thalamus, Basal ganglion and midbrain | 3 | X | wild type | 0 | wild type | 0 | 3 |
| 189 | F | 1 | 46 | 2 | AI    | 1 | Left Parietal                              | 2 | L | wild type | 0 | wild type | 0 | 3 |

## TERTp and IDH in grade II and III gliomas

|     |   |   |      |   |       |   |                       |   |   |           |    |           |   |    |
|-----|---|---|------|---|-------|---|-----------------------|---|---|-----------|----|-----------|---|----|
| 190 | M | 0 | 58   | 2 | AII   | 1 | Right Insular         | 2 | R | wild type | 0  | wild type | 0 | 3  |
| 191 | M | 0 | 18   | 1 | AAIII | 2 | Brainstem             | 3 | X | wild type | 0  | wild type | 0 | 3  |
| 192 | M | 0 | 59   | 2 | AAIII | 2 | Left Parietal         | 2 | L | wild type | 0  | wild type | 0 | 3  |
| 193 | M | 0 | 34   | 1 | AAIII | 2 | Left Thalamus         | 3 | X | wild type | 0  | wild type | 0 | 3  |
| 194 | M | 0 | 47   | 2 | AII   | 1 | Left Thalamus         | 3 | X | wild type | 0  | wild type | 0 | 3  |
| 195 | M | 0 | 36   | 1 | AII   | 1 | Right Thalamus        | 3 | X | wild type | 0  | wild type | 0 | 3  |
| 196 | M | 0 | 46   | 2 | AII   | 1 | Brainstem             | 3 | X | wild type | 0  | wild type | 0 | 3  |
| 197 | M | 0 | 47   | 2 | AII   | 1 | Left Thalamus         | 3 | X | wild type | 0  | wild type | 0 | 3  |
| 198 | M | 0 | 42   | 2 | AAIII | 2 | Right Frontal         | 1 | R | wild type | 0  | wild type | 0 | 3  |
| 199 | M | 0 | 59   | 2 | AAIII | 2 | Left temporal-insular | 2 | L | wild type | 0  | wild type | 0 | 3  |
| 200 | F | 1 | 56   | 2 | AII   | 1 | Right Basal ganglion  | 3 | X | wild type | 0  | wild type | 0 | 3  |
| 201 | F | 1 | 65   | 2 | AII   | 1 | Right Frontal         | 1 | R | wild type | 0  | wild type | 0 | 3  |
| 202 | M | 0 | 3    | 1 | AAIII | 2 | Right Temporal        | 2 | R | wild type | 0  | wild type | 0 | 3  |
| 203 | F | 1 | 13   | 1 | OII   | 1 | Left Temporal         | 2 | L | wild type | 0  | wild type | 0 | 3  |
| 204 | M | 0 | 12   | 1 | OAI   | 1 | Right Parietal        | 2 | R | wild type | 0  | wild type | 0 | 3  |
| 205 | M | 0 | 16   | 1 | OAI   | 1 | Right Frontal         | 1 | R | wild type | 0  | wild type | 0 | 3  |
| 206 | M | 0 | 7    | 1 | OAI   | 1 | Brainstem             | 3 | X | wild type | 0  | wild type | 0 | 3  |
| 207 | M | 0 | 8    | 1 | OAI   | 1 | Right Temporal        | 2 | R | wild type | 0  | wild type | 0 | 3  |
| 208 | F | 1 | 48   | 2 | OAI   | 1 | Right Frontal         | 1 | R | wild type | 0  | wild type | 0 | 3  |
| 209 | M | 0 | 55   | 2 | OAI   | 1 | Right Frontotemporal  | 2 | R | mutation  | 1  | R132H     | 1 | 1  |
| 210 | M | 0 | 28   | 1 | OII   | 1 | Left Temporal         | 2 | L | mutation  | 1  | R132H     | 1 | 1  |
| 211 | M | 0 | 27   | 1 | AII   | 1 | Left Frontal          | 1 | L | wild type | 0  | R132H     | 1 | 2  |
| 212 | F | 1 | 33   | 1 | AII   | 1 | Left Frontal          | 1 | L | wild type | 0  | R132H     | 1 | 2  |
| 213 | F | 1 | 63   | 2 | AAIII | 2 | Right Frontal         | 1 | R | wild type | 0  | wild type | 0 | 3  |
| 214 | F | 1 | 31   | 1 | AII   | 1 | Thoracic code T8-10   | 3 | X | wild type | 0  | wild type | 0 | 3  |
| 215 | M | 0 | 37   | 1 | AII   | 1 | Right Frontoparietal  | 2 | R | ND        | ND | R132H     | 1 | ND |
| 216 | M | 0 | 40   | 1 | AAIII | 2 | Left Temporal         | 2 | L | ND        | ND | R132H     | 1 | ND |
| 217 | M | 0 | 44   | 2 | AAIII | 2 | Left Temporal         | 2 | L | ND        | ND | R132H     | 1 | ND |
| 218 | M | 0 | 39   | 1 | OAI   | 1 | Right Frontoparietal  | 2 | R | ND        | ND | R132H     | 1 | ND |
| 219 | M | 0 | 40   | 1 | AAIII | 2 | Right Frontoparietal  | 2 | R | ND        | ND | R132H     | 1 | ND |
| 220 | M | 0 | 30.5 | 1 | OII   | 1 | Right Tempoparietal   | 2 | R | ND        | ND | wild type | 0 | ND |
| 221 | M | 0 | 60   | 2 | AOIII | 2 | Right Temporal        | 2 | R | ND        | ND | wild type | 0 | ND |

## TERTp and IDH in grade II and III gliomas

|     |   |   |      |   |       |   |                                             |   |   |    |    |           |   |    |
|-----|---|---|------|---|-------|---|---------------------------------------------|---|---|----|----|-----------|---|----|
| 222 | M | 0 | 28   | 1 | AAll  | 2 | Right Temporal-occipital and Left Occipital | 2 | R | ND | ND | wild type | 0 | ND |
| 223 | F | 1 | 62.5 | 2 | AAll  | 2 | Left Temporal                               | 2 | L | ND | ND | wild type | 0 | ND |
| 224 | F | 1 | 58   | 2 | All   | 1 | Bilateral Frontal and Right Temporal        | 2 | B | ND | ND | wild type | 0 | ND |
| 225 | F | 1 | 38   | 1 | AOAll | 2 | Left Frontal                                | 1 | L | ND | ND | wild type | 0 | ND |

Abbreviations: Gender: F=female; M=male; Gender code: 1=F, 0=M; Age code: 1=younger than or equal to 40 years old, 2=older than 40 years old; Pathology: All=astrocytoma WHO Grade II, OAll=oligoastrocytoma WHO Grade II, Oll=oligodendroglioma WHO Grade II, AAll=anaplastic astrocytoma WHO Grade III, AOAll=anaplastic oligoastrocytoma WHO Grade III, AOll=anaplastic oligodendroglioma WHO Grade III; Pathology code: 1=WHO Grade II, 2=WHO Grade III; Location code: 1=Frontal, 2=Others, 3=Midline; Location code 2: B=Bilateral, L=Left, R=Right, X=not determine; TERTp code: 1=mutation, 0=wild type; IDH1/2 code: 1=mutation, 0=wild type; IDH-TERTp code: 1= $IDH^{mut}$ -TERTp<sup>mut</sup>, 2= $IDH^{mut}$ -TERTp<sup>wt</sup> and  $IDH^{wt}$ -TERTp<sup>mut</sup>, 3= $IDH^{wt}$ -TERTp<sup>wt</sup>; ND=not detect.
